# Supplementary material
Source: Research Square preprint supplement (doi:10.21203/rs.3.rs-10003871/v1)
Supplement: Supplementary file 1 [file 0452aae3aba15263c875dee6.docx]

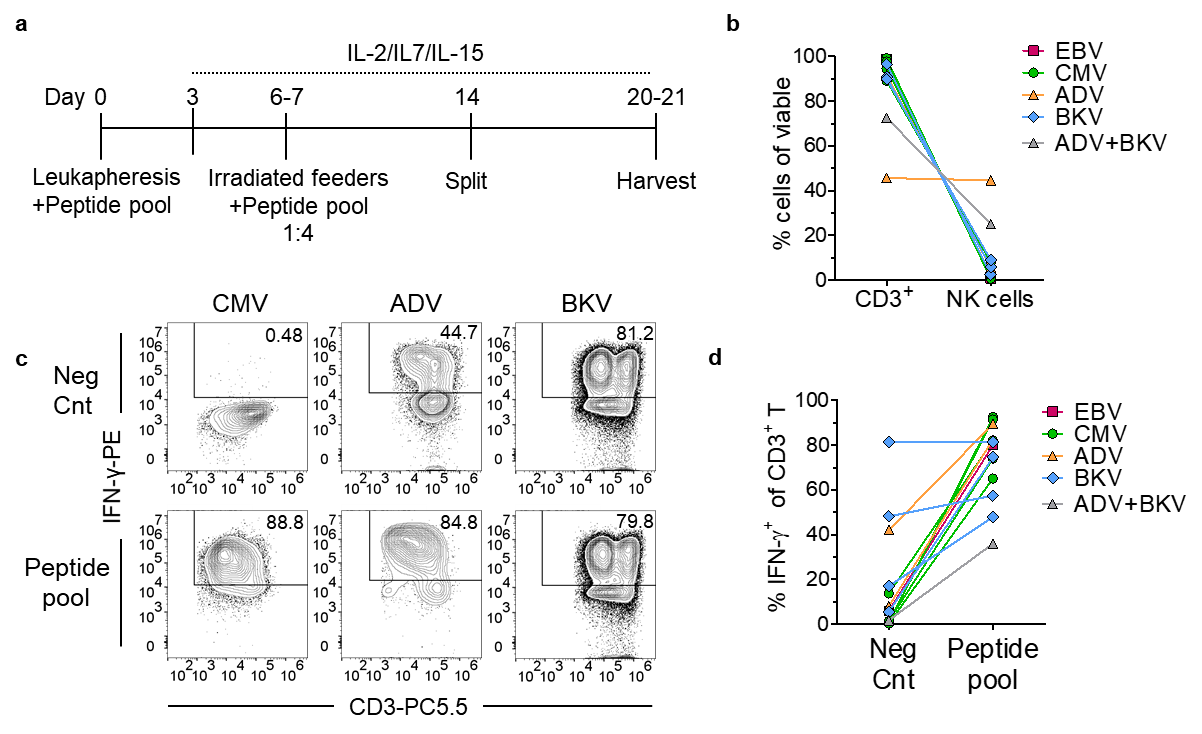


Supplementary Figure 1. Generation and expansion of VSTs from leukapheresis. (**a**) Schematic timeline of VSTs generation. (**b**) Percentage of CD3+ T cells or NK cells (CD3-CD56+) among total viable cells at day 21. (**c**) Representative flow cytometry plots gated on CD3⁺ cells showing IFN-γ expression in unstimulated negative control (Neg Cnt) and peptide pool stimulated samples at day 21. (**d**) Percentage of IFN-γ⁺ cells among CD3+ T cells in unstimulated Neg Cnt and peptide pool stimulated samples at day 21.


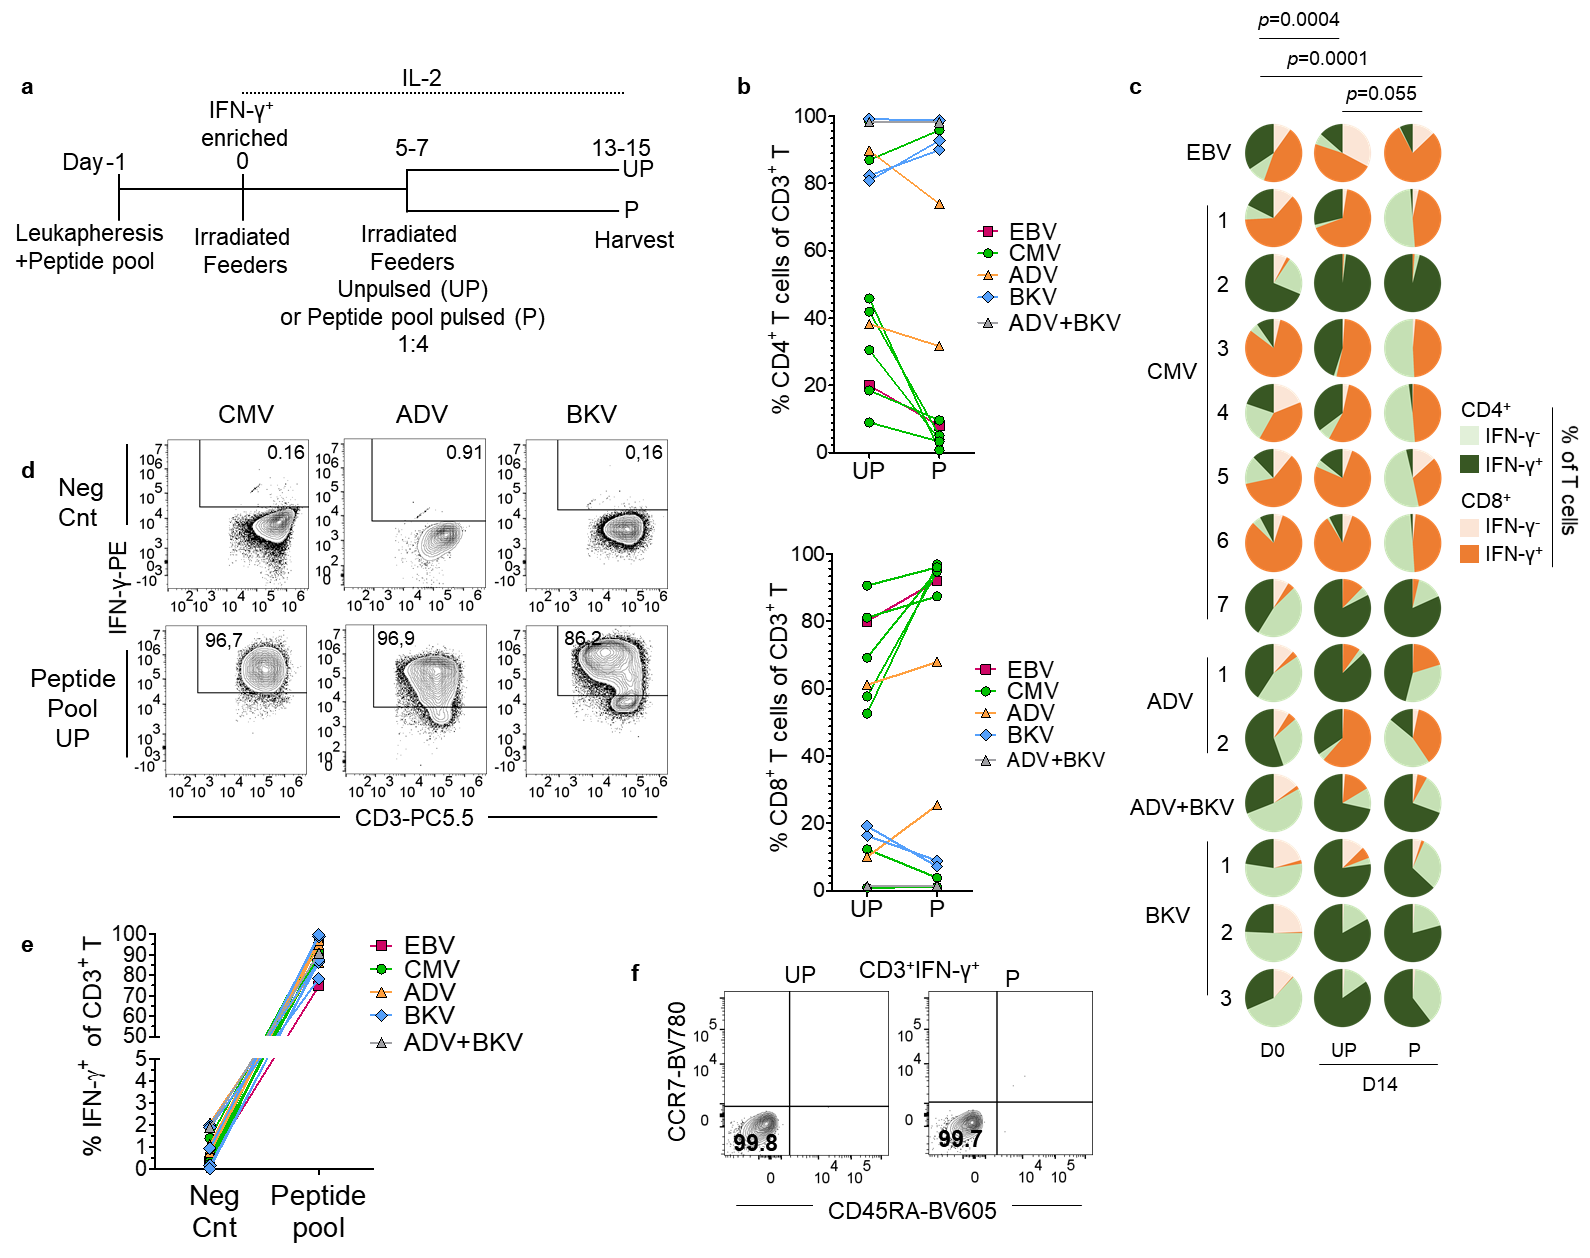


Supplementary Figure 2. VSTs IFN-γ-enriched expanded phenotype. (**a**) Schematic timeline of VSTs generation. (**b**) Proportion of CD4+ or CD8+ T cells among CD3+ T cells of UP or P condition. (**c**) Percentage of CD4+IFN-γ-, CD4+IFN-γ⁺, CD8+IFN-γ-, or CD8+IFN-γ⁺ cells among total T cells, Wilcoxon matched-pairs test. (**d**) Representative flow cytometry plots gated on CD3⁺ cells showing IFN-γ expression in unstimulated negative control (Neg Cnt) and peptide pool stimulated samples of UP condition. (**e**) Percentage of IFN-γ⁺ cells among CD3+ T cells in unstimulated Neg Cnt and peptide pool stimulated samples of UP condition. (**f**) Representative flow cytometry plots gated on CD3⁺IFN-γ⁺ cells depicting memory T cell marker expression under UP or P expansion conditions.


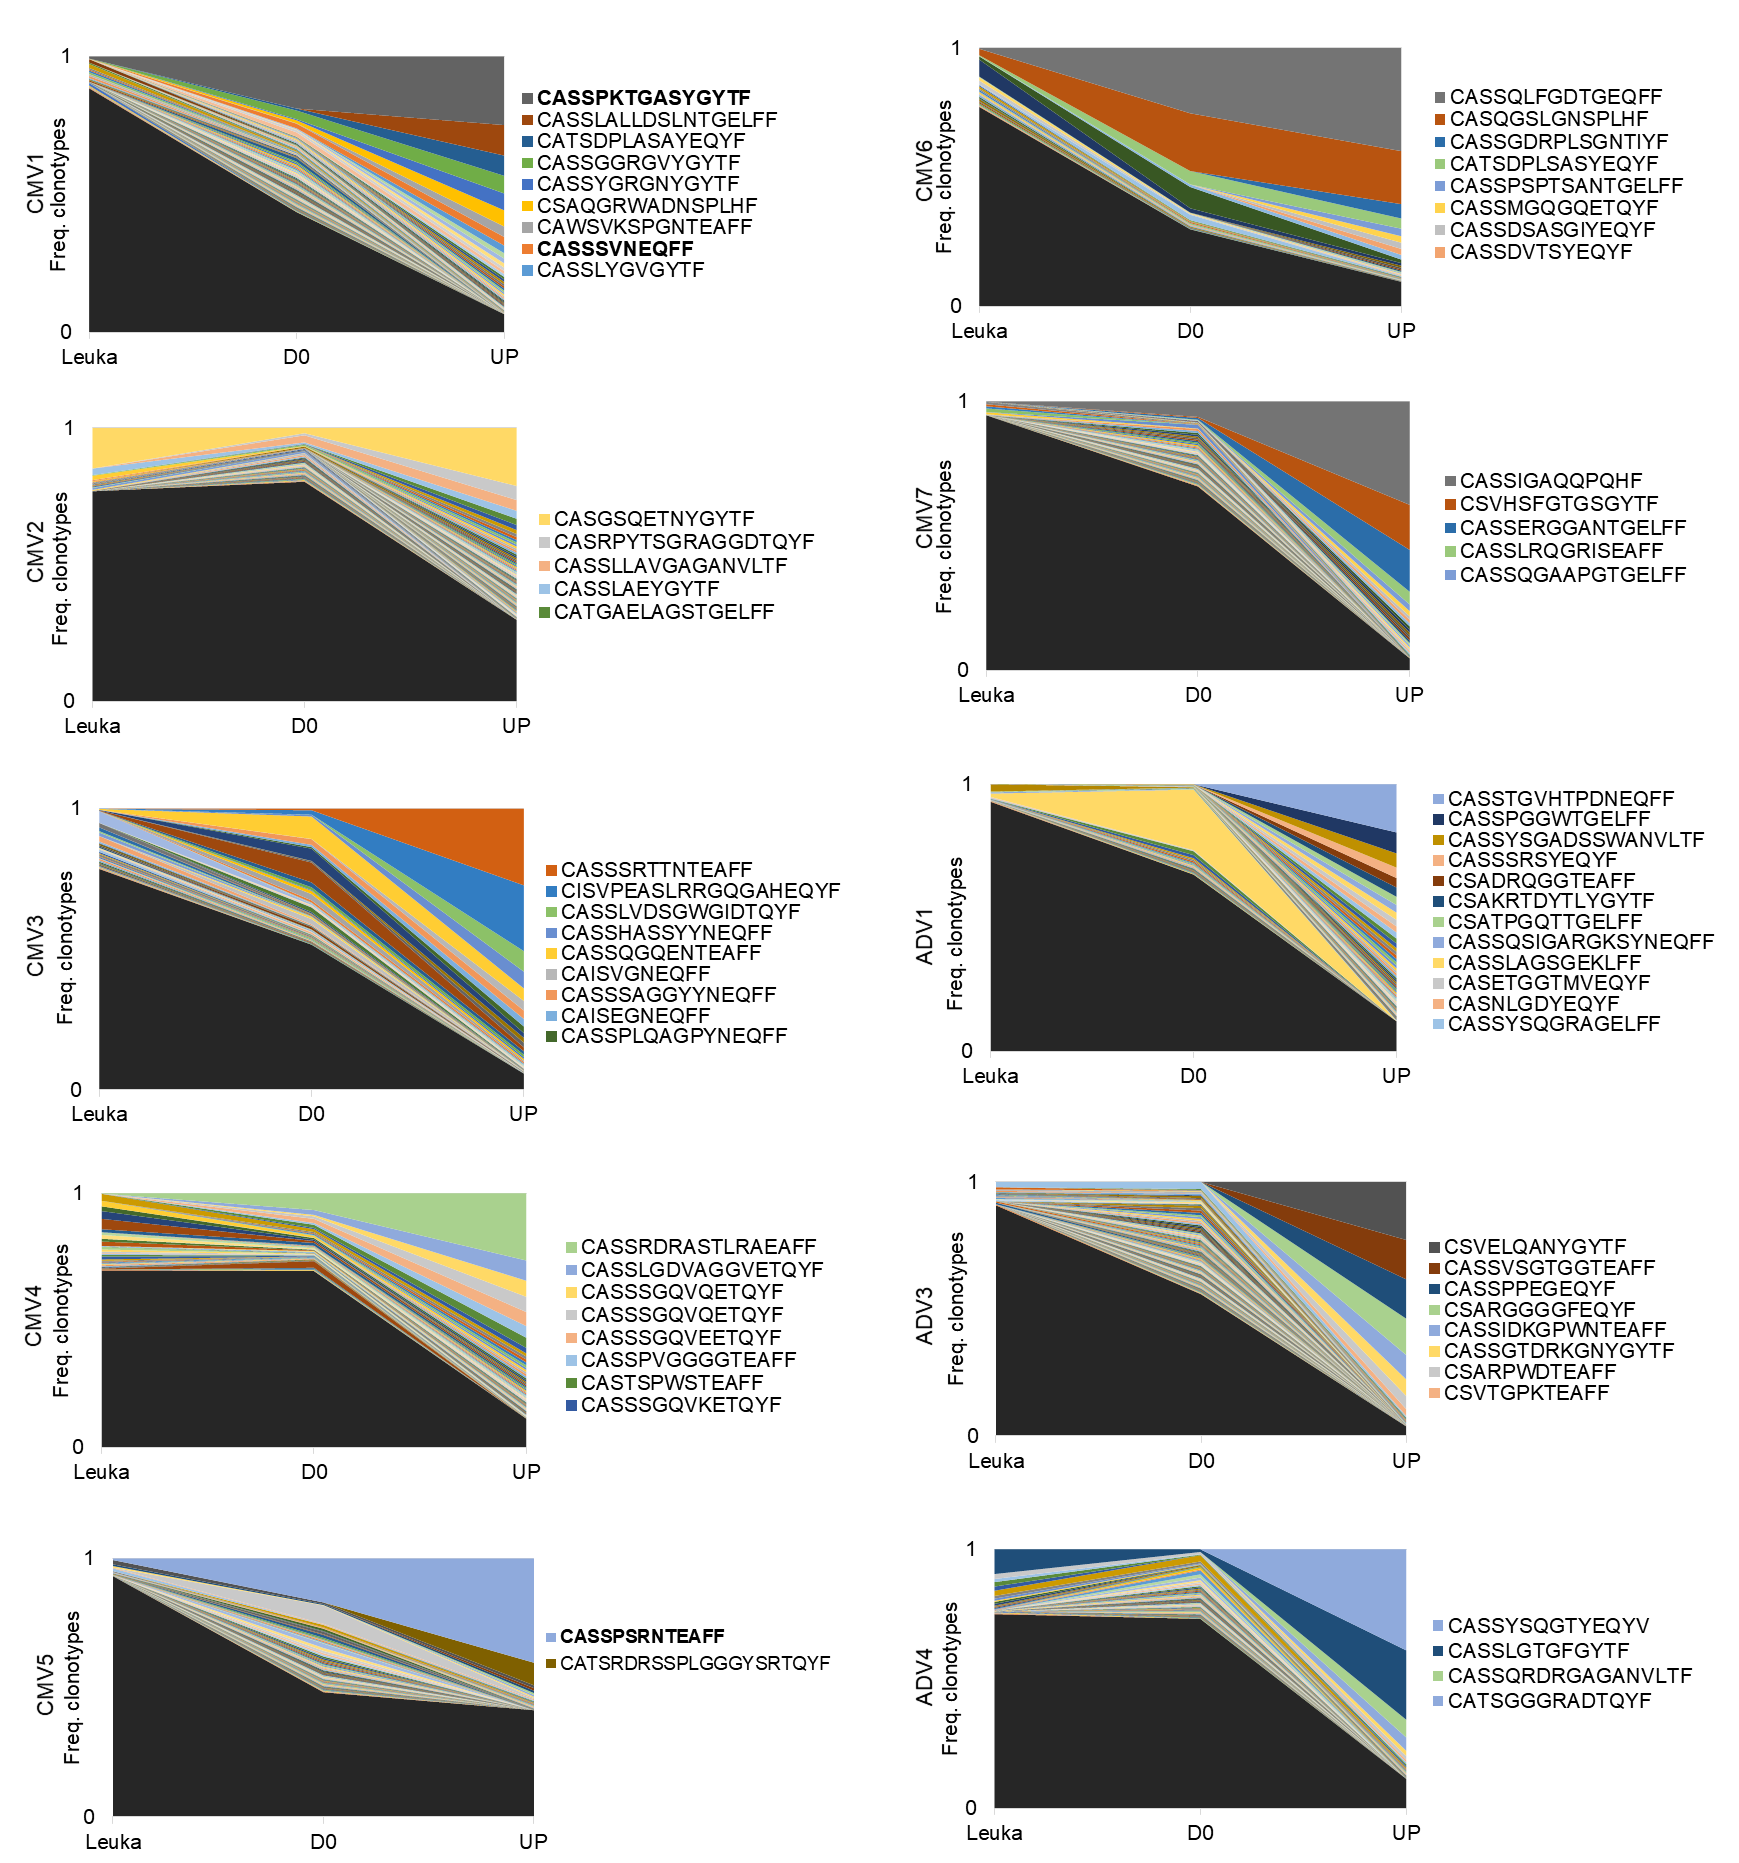


Supplementary Figure 3. TCRβ clonal of VSTs. Clonotype frequencies in IFN-γ-enriched day 0 product, and final UP or P T cell product. Clonotypes with <0.2% frequency are shown in black; CDR3 amino acid sequences are indicated for clonotypes representing ≥2% of the final product.


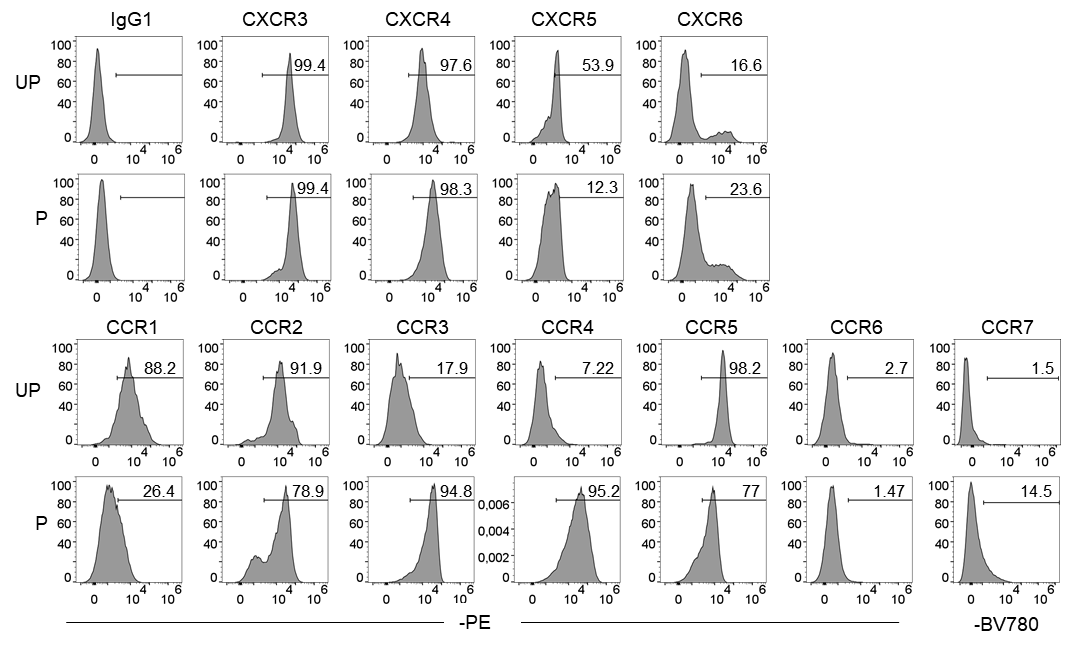


Supplementary Figure 4. Chemokine receptor expression by flow cytometry. Representative flow cytometry histograms of VSTs stained with chemokine receptor antibodies from UP and P conditions.


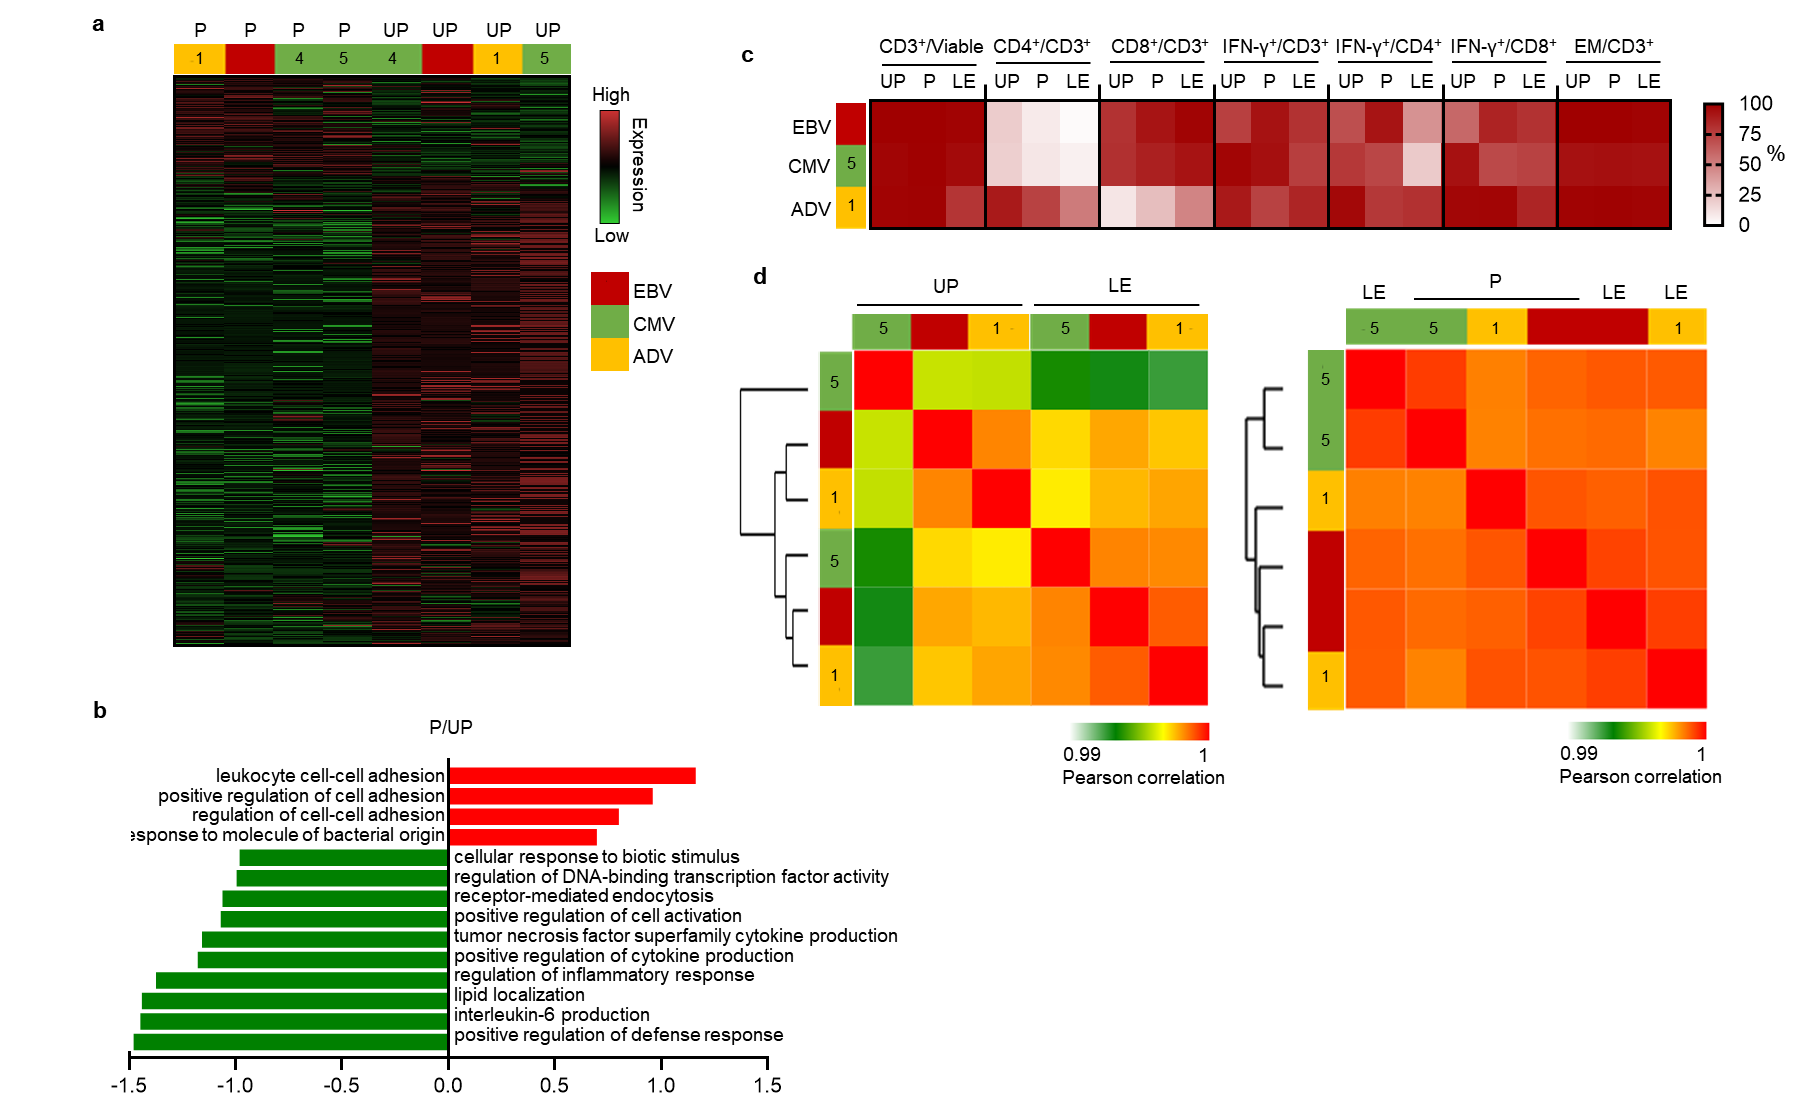


Supplementary Figure 5. Comparative transcriptional profiles across protocol conditions. (**a**) Heatmap of differential gene expression analysis between UP and P samples using a paired analysis, showing the distribution of significantly up-regulated (red) and down-regulated (green) genes and highlighting transcriptional differences between the two conditions. (**b**) Phenotypic characteristics and antigen specificity of VSTs generated under different protocols. **(c**) Gene set enrichment analysis of biological processes, with top ten positively enriched categories in red and negatively enriched categories in green for the P vs NP condition. (**d**) Hierarchical clustering heatmap based on sample-to-sample Pearson correlations, showing the grouping of LE samples with either UP or P conditions and highlighting global similarity patterns among samples.


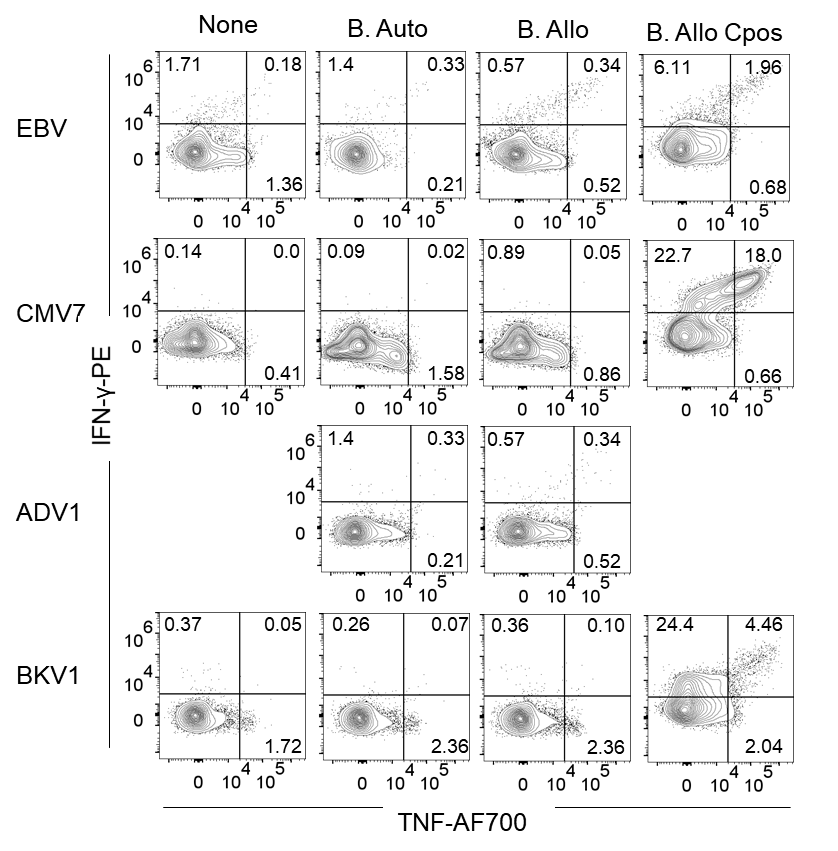


Supplementary Figure 6. Cytokine production of VSTs cocultured with autologous (Auto), or mix of three allogenic (Allo) PHA blasts (B) at effector:target ratio of 1:5.


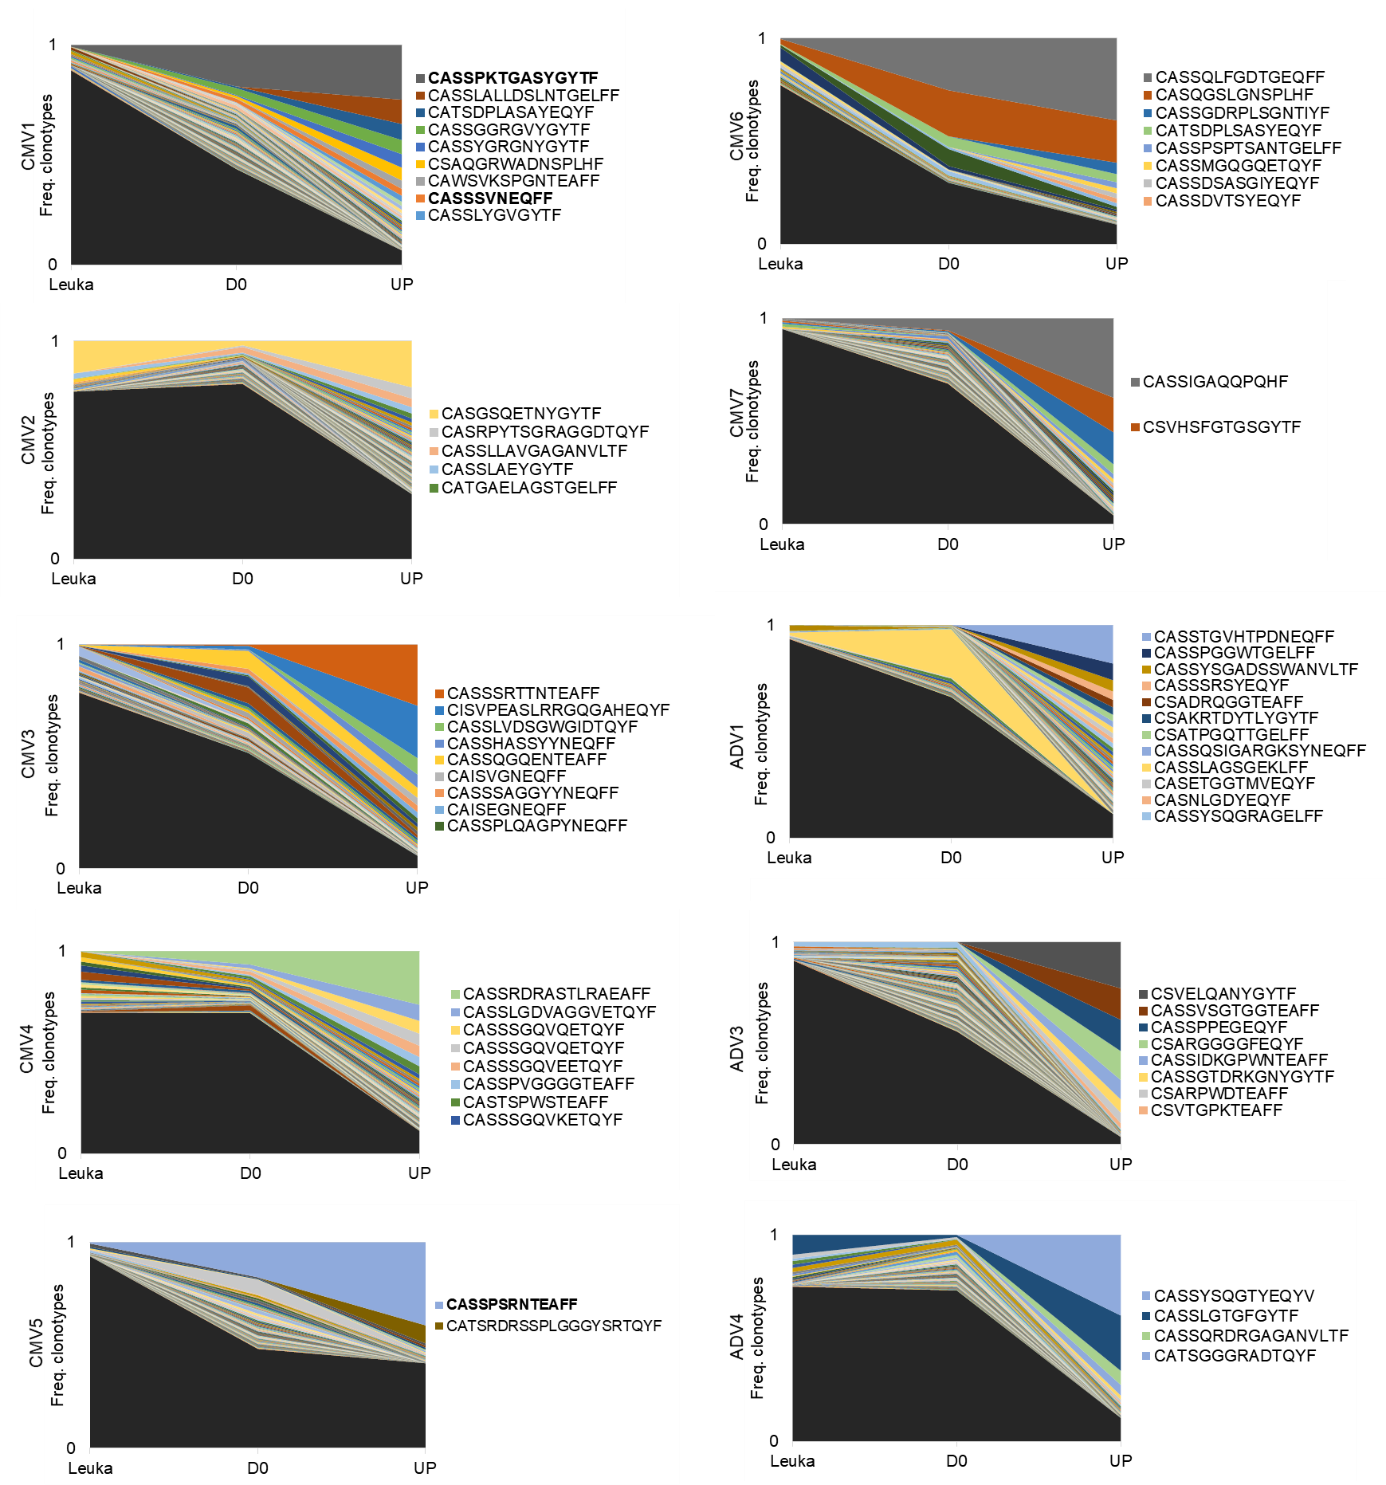


Supplementary Figure 7. TCRβ clonal expansion of VSTs. Clonotype frequencies in the original leukapheresis, IFN-γ-enriched day 0 product, and final T cell product. Clonotypes with <0.2% frequency are shown in black; CDR3 sequences are indicated for clonotypes representing ≥2% of the final product.


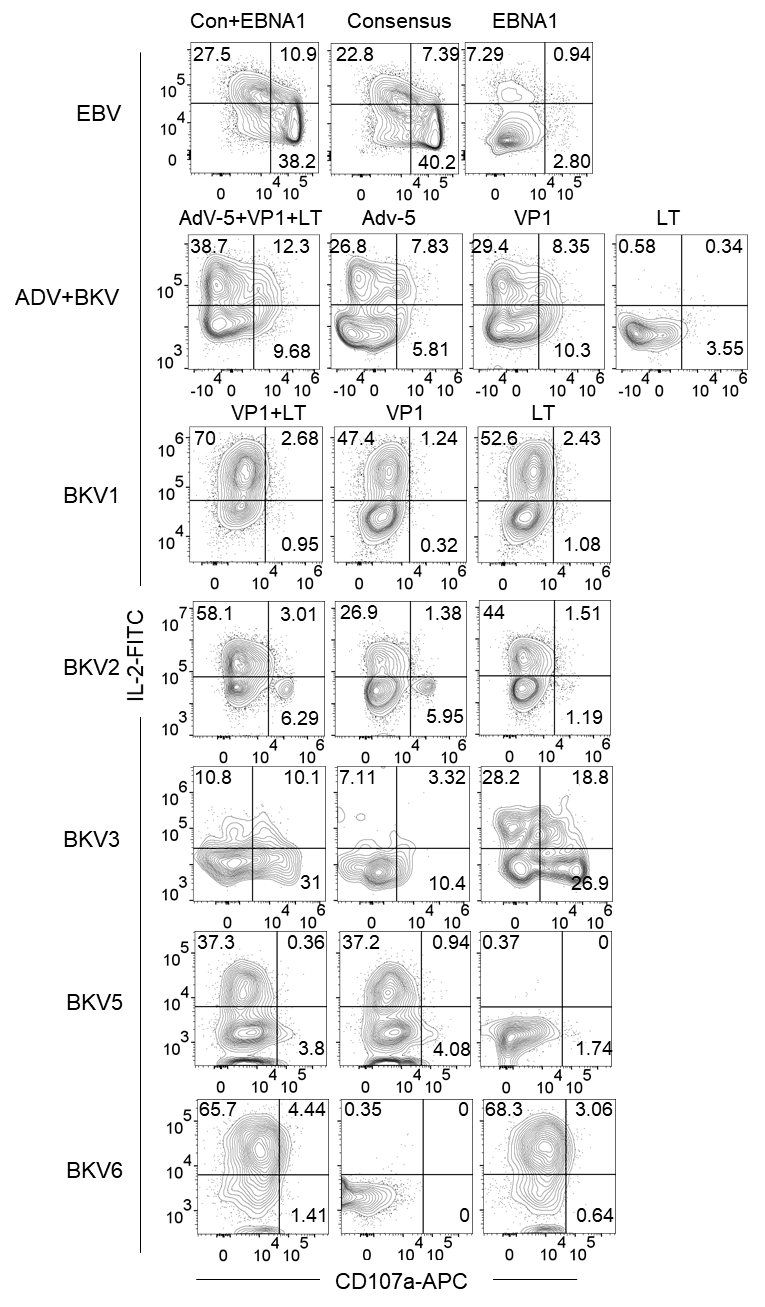


Supplementary Figure 8. IL-2 and CD107a expression among CD3⁺ T cells following stimulation with the indicated peptide pools.


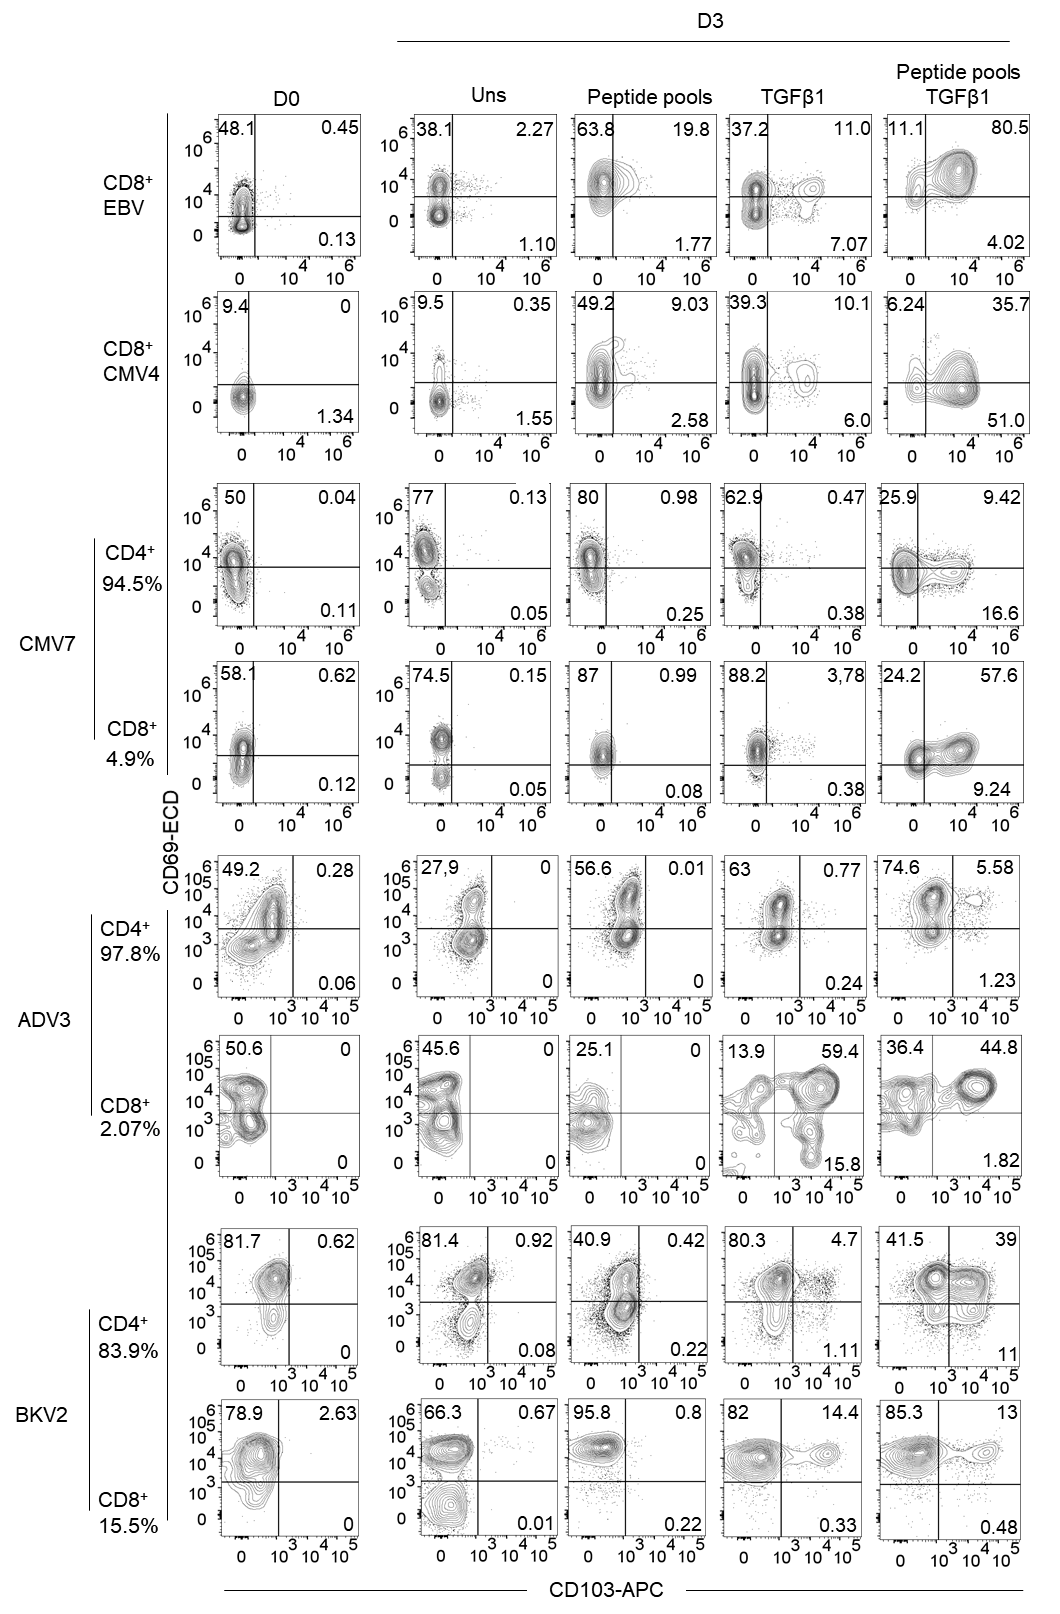


Supplementary Figure 9. Expression of adhesion receptors in VSTs stimulated with antigen and TGF-β1.
Thawed VSTs were stimulated for 3 days in the presence or absence of peptide pools, consensus+EBNA for EBV, pp65 for CMV, AdV5 Hexon for ADV, and VP1+LT for BKV, and/or TGF-β1, and stained for CD69 and CD103 expression.

Supplementary Table 1. T cell differentiated expressed genes in P condition vs UP condition.

| Gene | log2FoldChange | Gene | log2FoldChange |
| --- | --- | --- | --- |
| *SPRED1* | -8.13297125 | *DOCK1* | -4.22688567 |
| *RAB7B* | -7.67371866 | *RAB31* | -4.18039562 |
| *CCND1* | -6.95089061 | *TLR2* | -4.09466511 |
| *SIGLEC7* | -6.79307221 | *SLC7A8* | -4.07090962 |
| *UBE2E2* | -6.76634754 | *RAB32* | -4.00942576 |
| *TYROBP* | -6.52704192 | *TNFAIP2* | -3.98183102 |
| *PPIC* | -6.34412735 | *ZNF385A* | -3.96523301 |
| *SYK* | -6.31013854 | *RAB20* | -3.96470987 |
| *IFNGR2* | -6.2290089 | *RNF144B* | -3.87790604 |
| *SPP1* | -6.16390249 | *PLA2G4A* | -3.85957836 |
| *P2RY6* | -6.15826825 | *CSF2RA* | -3.83722732 |
| *LMO2* | -6.15439485 | *CDC42BPB* | -3.45416565 |
| *IL1R1* | -6.10854676 | *CUEDC1* | -3.43807806 |
| *LRP1* | -6.01888657 | *BATF2* | -3.3818148 |
| *BTK* | -6.00885812 | *CXCL16* | -3.34795114 |
| *MMP9* | -6.00441255 | *NEK6* | -3.00882366 |
| *FFAR4* | -5.98092688 | *IL6* | -2.88947901 |
| *ARHGAP22* | -5.95714583 | *ST6GALNAC2* | -2.81010576 |
| *ABCC3* | -5.9259596 | *IL17RC* | -2.67905188 |
| *GPR82* | -5.34966363 | *PTGDR* | -2.65257991 |
| *KCNMA1* | -5.34404476 | *TNS1* | -2.55072514 |
| *IL13RA1* | -5.31174539 | *SH2B2* | -2.5234743 |
| *FABP3* | -5.24818313 | *IFIT2* | -2.48643113 |
| *NFAM1* | -5.24385271 | *TNFSF13B* | -2.34142446 |
| *NOTCH3* | -5.21576388 | *RIPK2* | -2.29697848 |
| *SLC7A7* | -5.0821511 | *CD33* | -2.29327076 |
| *LPAR1* | -5.00096655 | *GM2A* | -2.16890669 |
| *FCER1G* | -4.92189722 | *IFIT3* | -2.16296772 |
| *DAPK1* | -4.91229385 | *CXCL8* | -2.12122083 |
| *RAB39A* | -4.91046758 | *NPC2* | -2.0033247 |
| *NRP2* | -4.82313719 | *TSC22D1* | -1.95289101 |
| *EPB41L1* | -4.74396116 | *ATP1B1* | -1.94806323 |
| *CTSL* | -4.71208538 | *CYP27B1* | -1.84796144 |
| *ST3GAL6* | -4.68655431 | *EGR2* | -1.77589466 |
| *FZD1* | -4.66397357 | *TCF7* | -1.69548562 |
| *F3* | -4.59951899 | *CSF2* | 1.71743478 |
| *CDK14* | -4.55671038 | *TNFRSF9* | 1.7354969 |
| *FMN1* | -4.52385797 | *RAB6B* | 2.08281946 |
| *ALOX5* | -4.45210939 | *FOXP3* | 2.22727066 |
| *CXCL2* | -4.42009984 | *EGR3* | 2.693671 |
| *CTBP2* | -4.40748767 | *KLRC2* | 2.87052228 |
| *JAG1* | -4.36882164 | *DGKI* | 3.74817801 |
| *CAMSAP2* | -4.23337149 | *NT5E* | 4.72373456 |

Supplementary Table 2. HLA genotyping of the cell donors.

| **Sample** | ***HLA-A*** | ***HLA-B*** | ***HLA-C*** | ***HLA-DRB1*** | ***HLA-DQB1 1*** |
| --- | --- | --- | --- | --- | --- |
| EBV | *A*02:01, A*24:02* | *B*35:02, B*40:02* | *C*04:01, C*15:02* | *DRB1*04:03, DRB1*11:04* | *DQB1*03:01, DQB1*03:02* |
| CMV1 | *A*02:01, A*29:02* | *B*44:02, B*49:01* | *C*05:01, C*07:01* | *DRB1*01:01, DRB1*01:01* | *DQB1*05:01, DQB1*05:01* |
| CMV2 | *A*02:01, A*30:02* | *B*08:01, B*18:01* | *C*05:01, C*07:01* | *DRB1*03:01, DRB1*03:01* | *DQB1*02:01, DQB1*02:01* |
| CVM3 | *A*24:02, A*29:02* | *B*35:03, B*44:03* | *C*12:03, C*16:01* | *DRB1*13:01, DRB1*15:01* | *DQB1*06:02, DQB1*06:03* |
| CMV4 | *A*24:02, A*33:01* | *B*14:02:, B*51:01* | *C*02:02, C*08:02* | *DRB1*01:02, DRB1*04:07* | *DQB1*03:01, DQB1*05:01* |
| CVM5 | *A*01:01, A*03:01* | *B*07:02, B*37:01* | *C*06:02, C*07:02P* | *DRB1*10:01, DRB1*11:01* | *DQB1*03:01, DQB1*05:01* |
| CMV6 | *A*02:01, A*02:01* | *B*13:01, B*57:01* | *C*06:02, C*04:03* | *DRB1*07:01, DRB1*15:01* | *DQB1*06:01, DQB1*03:03* |
| CMV7 | *A*02:01, A*29:02* | *B*18:01, B*44:03* | *C*07:01, C*16:01* | *DRB1*07:01, DRB1*11:04* | *DQB1*02:02, DQB1*03:01* |
| ADV1 | *A*01:01, A*23:01* | *B*08:01, B*27:05* | *C*02:02, C*07:01* | *DRB1*03:01, DRB1*03:01* | *DQB1*02:01, DQB1*02:01* |
| ADV2 | *A*24:02, A*26:01* | *B*07:02, B*14:01* | *C*07:02, C*08:02* | *DRB1*01:03, DRB1*15:01* | *DQB1*05:01, DQB1*06:02* |
| BKV1 | *A*24:02, A*01:01* | *B*18:01, B*52:01* | *C*12:02, C*12:03* | *DRB1*15:02, DRB1*13:01* | *DQB1*06:01, DQB1*06:03* |
| BKV2 | *A*02:01, A*24:02* | *B*44:03, B*51:01* | *C*02:02, C*16:01* | *DRB1*07:01, DRB1*07:01* | *DQB1*02:02, DQB1*02:02* |
| BKV3 | *A*02:01, A*11:01* | *B*37:01, B*38:01* | *C*06:02, C*12:03* | *DRB1*01:01, DRB1*10:01* | *DQB1*05:01, DQB1*05:01* |
| ADV+BK | *A*02:01, A*24:02* | *B*35:01, B*35:02* | *C*04:01, C*04:01* | *DRB1*11:01, DRB1*11:04* | *DQB1*03:01, DQB1*03:01* |
| ADV3 | *A*25:01, A*33:01* | *B*14:02, B*18:01* | *C*08:02, C*12:03* | *DRB1*01:02, DRB1*13:01* | *DQB1*05:01, DQB1*06:03* |
| ADV4 | *A*11:01, A*33:03* | *B*51:01, B*58:01* | *C*03:02, C*15:02* | *DRB1*13:01, DRB1*15:01* | *DQB1*06:02, DQB1*06:03* |
| BKV4 | *A*01:01, A*02:01* | *B*08:01, B*44:02* | *C*05:01, C*07:01* | *DRB1*03:01, DRB1*08:01* | *DQB1*02:01, DQB1*04:02* |
| BKV5 | *A*02:01, A*66:01* | *B*14:01, B*35:01* | *C*04:01, C*08:02* | *DRB1*07:01, DRB1*07:01* | *DQB1*02:02, DQB1*02:02* |
| BKV6 | *A*02:01, A*30:02* | *B*18:01, B*49:01* | *C*05:01, C*07:01* | *DRB1*01:01, DRB1*03:01* | *DQB1*02:01, DQB1*05:01* |
| BKV Scale-up | *A*30:02, A*31:01* | *B*18:01, B*18:01* | *C*05:01, C*05:01* | *DRB1*03:01, DRB1*03:01* | *DQB1*02:01, DQB1*02:01* |
